# Supplementary material for: Ratiometric detection of Zn2+ and Cd2+ based on self-assembled nanoarchitectures with dual emissions involving aggregation enhanced emission (AEE) and its application
Source: Royal Society of Chemistry journal article supplement (doi:10.1039/c8tb01046c), 2018-01-01
Supplement: c8tb01046c1.pdf [file c8tb01046c1.pdf]

## Supplementary Information for

### **Ratiometric detection of Zn<sup>2+</sup> and Cd<sup>2+</sup> based on self-assembled nanoarchitectures with dual emissions involving aggregation enhanced emission (AEE) and its application**

Fei Qu<sup>a,b</sup>, Lingyun Zhao<sup>a,b</sup>, Wenli Han<sup>c\*</sup>, Jinmao You<sup>a,b,d</sup>,

<sup>a</sup> The Key Laboratory of Life-Organic Analysis, Qufu Normal University, Qufu 273165, Shandong, China

<sup>b</sup> Key Laboratory of Pharmaceutical Intermediates and Analysis of Natural Medicine, Qufu Normal University, Qufu 273165, Shandong, China

<sup>c</sup> Laboratory Animal Center, Chongqing Medical University, Chongqing, China

<sup>d</sup> Northwest Institute of Plateau Biology, Chinese Academy of Sciences, Xining 810001, China

\* Corresponding authors: 0904hanwenli@163.com

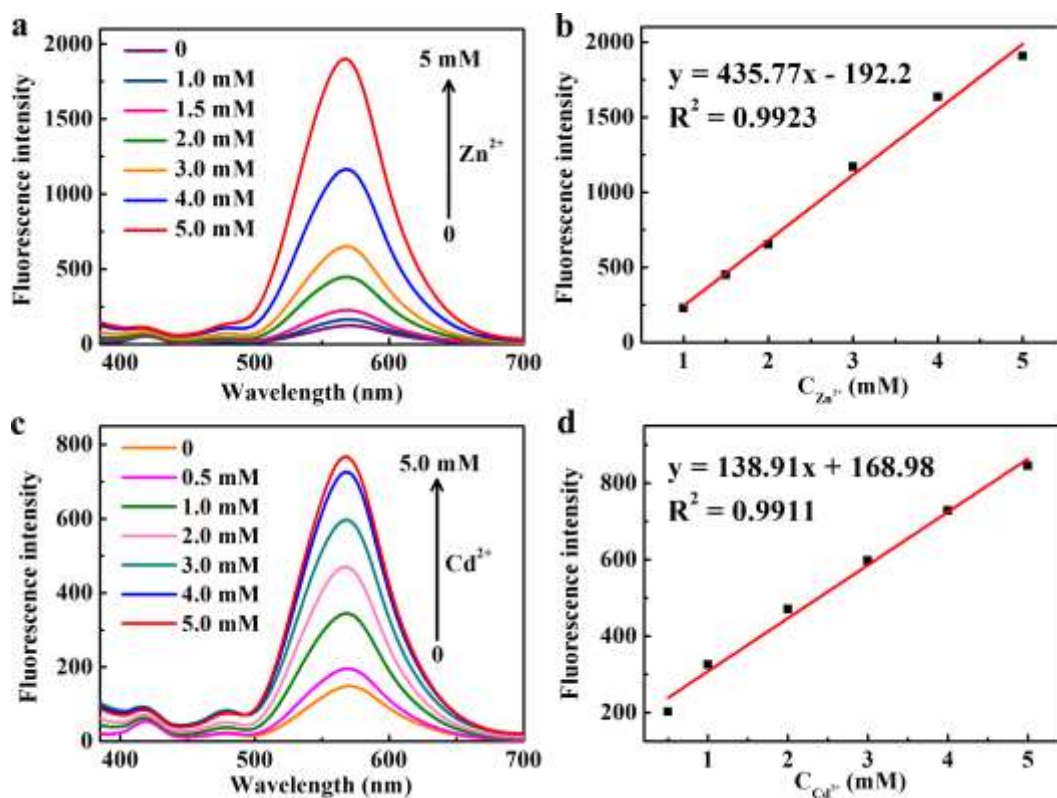

Fig. S1 Fluorescence spectra of free GSH-AuNCs in the absence and presence of the different concentrations of the Zn<sup>2+</sup> and Cd<sup>2+</sup> (a, c). Corresponding linear ranges from 1 to 5 mM of Zn<sup>2+</sup> and 0.5 to 5 mM of Cd<sup>2+</sup> (b, d).

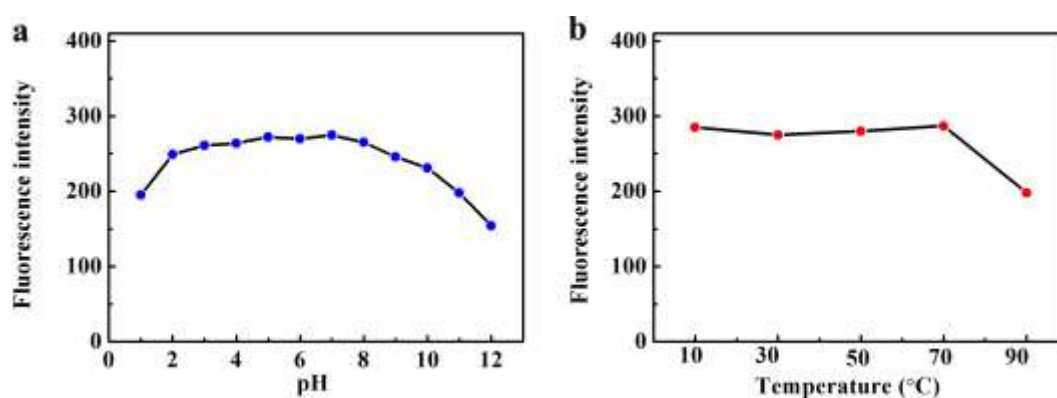

Fig. S2 Influences of pH and temperature on the fluorescence intensity of free GSH-AuNCs (130 µg/mL).

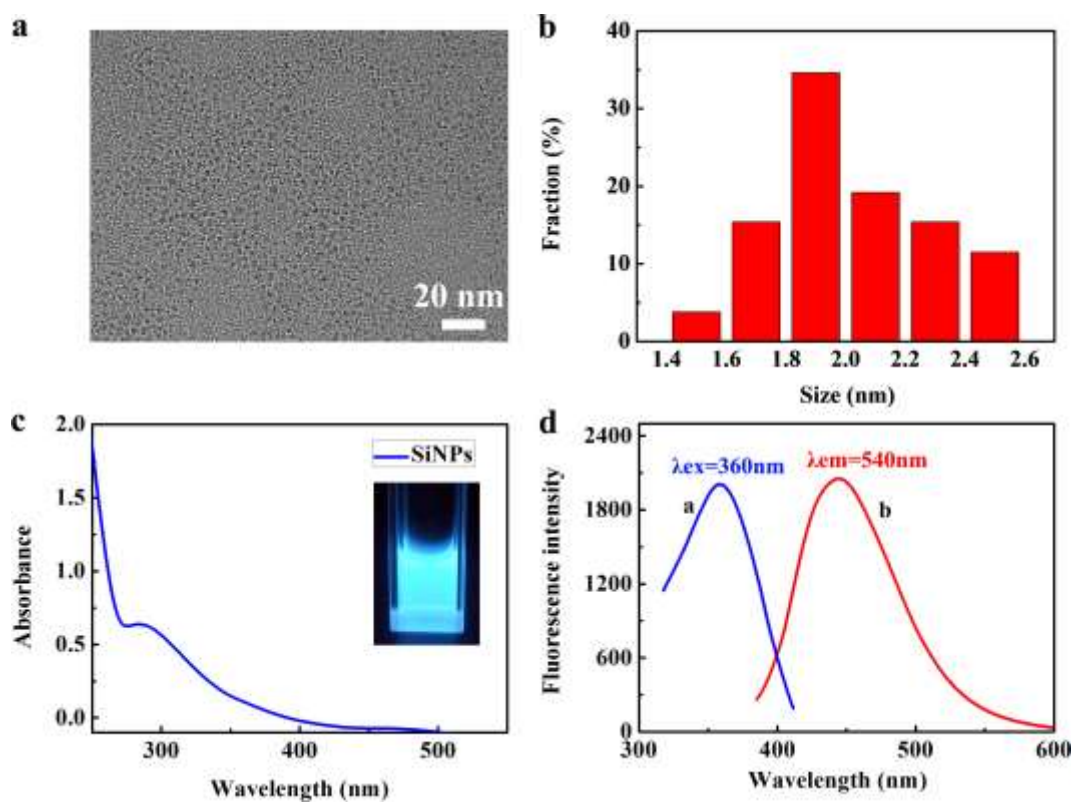

Fig. S3 TEM image (a), size distribution (b), UV-vis absorption spectrum (c), and excitation and emission spectra of SiNPs (d). The inset of (c) is photograph of SiNPs solution under UV light at 365 nm.

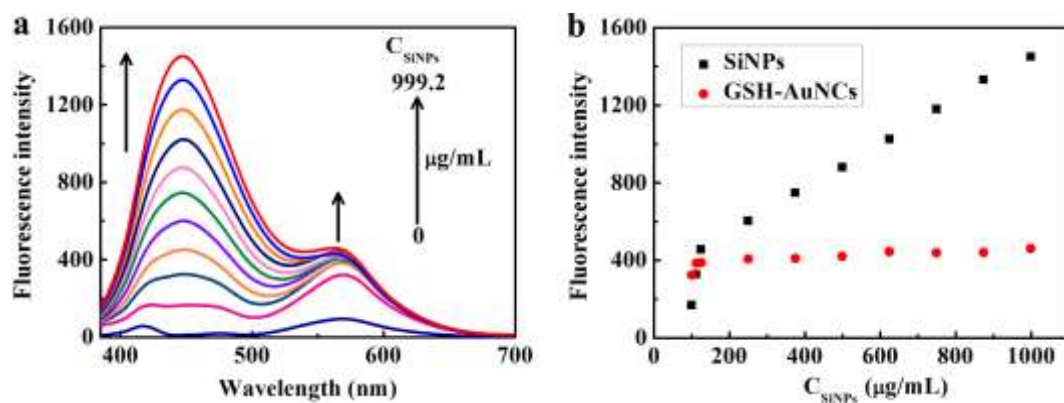

Fig. S4 Fluorescence spectra of GSH-AuNCs in the absence and presence of the different concentrations of the SiNPs (a) and corresponding fluorescence intensity variations of SiNPs and GSH-AuNCs (b). The concentration of GSH-AuNCs is 26  $\mu\text{g/mL}$  and the concentrations of SiNPs are 0, 99.92, 112.4, 124.9, 249.8, 374.7, 499.6, 624.5, 749.4, 874.3 and 999.2  $\mu\text{g/mL}$  from bottom to top in (a), respectively.

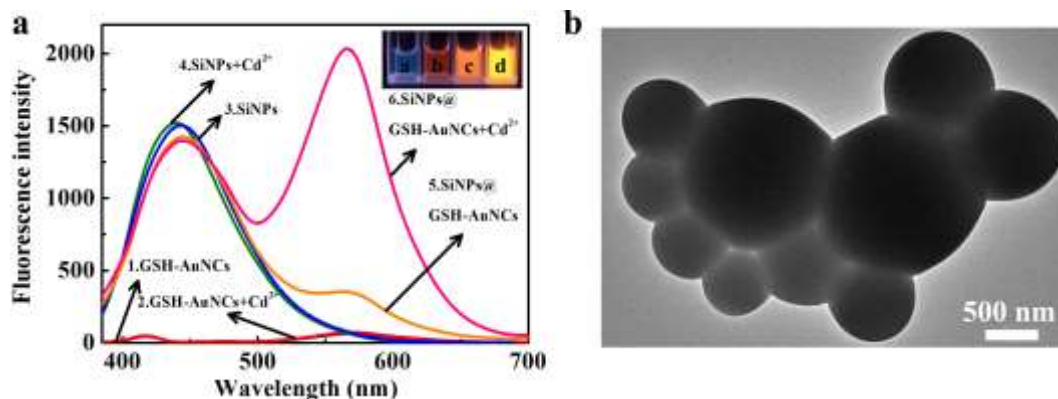

Fig. S5 Fluorescence spectra of GSH-AuNCs, SiNPs, and SiNPs@GSH-AuNCs in the absence (curve 1, 3, 5) and presence of  $\text{Cd}^{2+}$  (curve 2, 4, 6), respectively (a), and TEM image of SiNPs@GSH-AuNCs in the presence of  $\text{Cd}^{2+}$  (b). The inset of (a) is the photographs of the corresponding solutions under the UV lamp (a: SiNPs; b: GSH-AuNCs; c: SiNPs@GSH-AuNCs; d: SiNPs@GSH-AuNCs+ $\text{Cd}^{2+}$ ). The concentration of  $\text{Cd}^{2+}$  is  $150 \mu\text{M}$ .

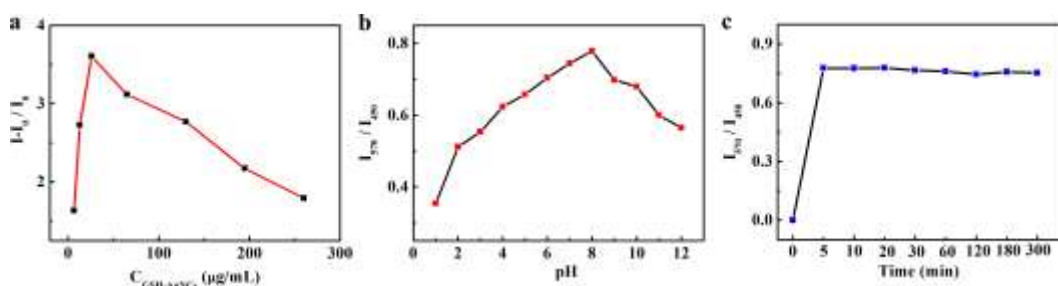

Fig. S6 Effects of probe concentration (a), pH value (b) and incubation time (c) on the fluorescence responses of SiNPs@GSH-AuNCs on  $\text{Zn}^{2+}$  detection. The concentration of  $\text{Zn}^{2+}$  is  $50 \mu\text{M}$ .

To optimize the probe concentration, the different concentrations of GSH-AuNCs were separately added into the aqueous solutions, and then  $5 \mu\text{L}$  SiNPs ( $124 \text{ mg/mL}$ ) and  $50 \mu\text{M}$  of  $\text{Zn}^{2+}$  were injected into the above solutions (the total volume is  $1 \text{ mL}$ ). In Fig. S5a, the fluorescence of SiNPs@GSH-AuNCs at  $570$

nm in the absence and presence of  $Zn^{2+}$  is expressed as  $I_0$  and  $I$ , respectively. When the concentration of GSH-AuNCs is  $26 \mu\text{g/mL}$ , the 4.6 folds increase in luminescence at 570 nm can be attained after the addition of  $50 \mu\text{M } Zn^{2+}$ . As illustrated in Fig. S5b, the fluorescence intensity ratio ( $I_{570}/I_{450}$ ) of SiNPs@GSH-AuNCs tends to increase first and then decrease with the increasing pH values from 1.0-12.0 after adding  $Zn^{2+}$  ( $50 \mu\text{M}$ ), and the maximum ratio is obtained in pH 8.0. Thus, the pH 8.0 in HEPES buffer is chosen as the ideal reaction pH. Additionally, the complete interaction between the SiNPs@GSH-AuNCs and  $Zn^{2+}$  can be achieved in 5 min, indicating a rapid reaction rate, so 5 min is selected as the optimum reaction time (c).

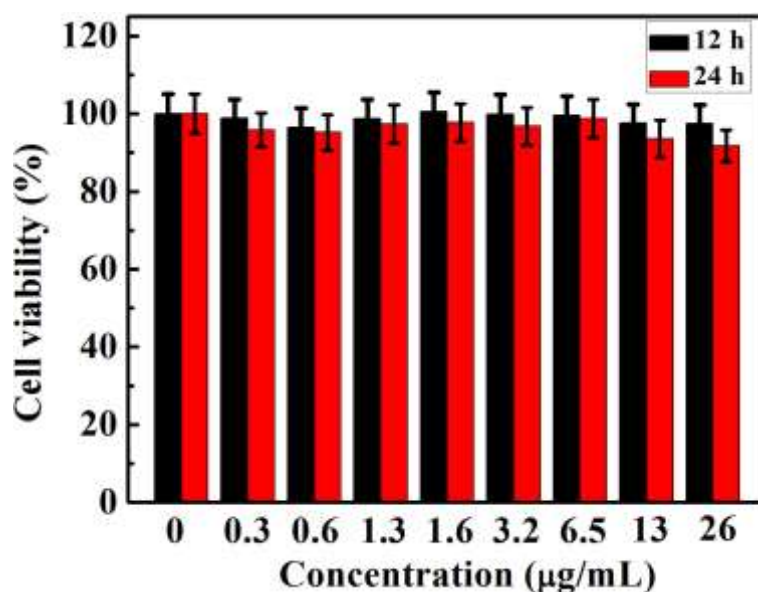

Fig. S7 Cell viability values (%) estimated by CCK-8 assay of H1688 cell after 12 h and 24 h incubation with the different concentration of SiNPs@GSH-AuNCs. The concentration of SiNPs ( $624.5 \mu\text{g/mL}$ ) is fixed and the concentrations of GSH-AuNCs is varied from 0 to  $26 \mu\text{g/mL}$ .
